# Supplementary material for: Serum and Soleus Metabolomics Signature of Klf10 Knockout Mice to Identify Potential Biomarkers
Source: MDPI journal article supplement (doi:10.3390/metabo12060556), 2022-06-17
Supplement: s1 [file s1]

## Supplementary data

Table S1

| Metabolite VIP                            | VIP value | Contribution score | p-value               | Fold Change | Chemical classes                    |
|-------------------------------------------|-----------|--------------------|-----------------------|-------------|-------------------------------------|
| PE(20:4(5Z,8Z,11Z,14Z)/18:1(11Z))         | 1.524     | 2.07               | 1.42 10 <sup>-3</sup> | 3.428       | Phospholipids                       |
| PE(22:6(4Z,7Z,10Z,13Z,16Z,19Z)/18:1(11Z)) | 1.463     | 1.73               | 3.24 10 <sup>-3</sup> | 3.738       | Phospholipids                       |
| Indoleacetic acid                         | 1.450     | 2.20               | 1.77 10 <sup>-4</sup> | 2.569       | Aromatic compounds-Amines           |
| Hippuric acid                             | 1.435     | -2.44              | 3.50 10 <sup>-6</sup> | 0.056       | Amino acids-Derivatives             |
| PE(16:0/20:4(5Z,8Z,11Z,14Z))              | 1.323     | 1.93               | 3.91 10 <sup>-4</sup> | 2.151       | Phospholipids                       |
| Serotonin                                 | 1.317     | -2.15              | 8.87 10 <sup>-6</sup> | 0.476       | Amino acids-Derivatives             |
| Cholic acid                               | 1.301     | 2.01               | 3.19 10 <sup>-5</sup> | 20.144      | Lipids: Fatty acids-Steroids        |
| PC(14:0/16:0)                             | 1.270     | 1.98               | 3.45 10 <sup>-5</sup> | 1.566       | Phospholipids                       |
| Guanidoacetic acid                        | 1.256     | 1.87               | 9.68 10 <sup>-5</sup> | 2.290       | Amino acids-Derivatives             |
| N-Acetylserotonin                         | 1.255     | -1.94              | 4.57 10 <sup>-5</sup> | 0.377       | Amino acids-Derivatives             |
| L-Acetylcarnitine                         | 1.236     | 1.89               | 6.81 10 <sup>-5</sup> | 1.531       | Lipids: Fatty acids-Steroids        |
| O-Acetyl-L-carnitine                      | 1.233     | 1.88               | 7.14 10 <sup>-5</sup> |             | Lipids: Fatty acids-Steroids        |
| Glycerophosphocholine                     | 1.229     | -1.75              | 2.54 10 <sup>-4</sup> | 0.425       | Lipids: Fatty acids-Steroids        |
| PC(15:0/20:2(11Z,14Z))                    | 1.223     | 1.82               | 1.18 10 <sup>-4</sup> | 1.521       | Phospholipids                       |
| N-acetyltryptophan                        | 1.218     | 1.79               | 1.52 10 <sup>-4</sup> | 2.990       | Amino acids-Derivatives             |
| 4-Trimethylammoniobutanoic acid           | 1.213     | 1.82               | 1.15 10 <sup>-4</sup> | 1.553       | Lipids: Fatty acids-Steroids        |
| Trigonelline                              | 1.203     | -1.79              | 1.39 10 <sup>-4</sup> | 0.425       | Aromatic compounds-Amines           |
| N-Methyltryptamine                        | 1.192     | -1.61              | 1.45 10 <sup>-3</sup> | 0.323       | Aromatic compounds-Amines           |
| Tetradecanoylcarnitine                    | 1.176     | 1.68               | 2.89 10 <sup>-4</sup> | 2.052       | Lipids: Fatty acids-Steroids        |
| Cytosine                                  | 1.164     | -1.68              | 3.10 10 <sup>-4</sup> | 0.601       | Nucleotides-Nucleosides-Derivatives |
| Nicotinic acid                            | 1.152     | 1.62               | 6.80 10 <sup>-4</sup> | 1.659       | Aromatic compounds-Amines           |
| L-Threonine                               | 1.149     | -0.34              | >0.05                 | 0.964       | Amino acids-Derivatives             |
| Ketoleucine                               | 1.148     | -1.60              | 7.24 10 <sup>-4</sup> | 0.474       | Amino acids-Derivatives             |
| PC(15:0/16:0)                             | 1.138     | 1.57               | 5.84 10 <sup>-4</sup> | 1.441       | Phospholipids                       |
| Cholesteryl acetate                       | 1.137     | 1.56               | 1.10 10 <sup>-3</sup> | 1.929       | Lipids: Fatty acids-Steroids        |
| L-Lysine                                  | 1.136     | -1.55              | 6.95 10 <sup>-4</sup> | 0.780       | Amino acids-Derivatives             |
| L-Valine                                  | 1.128     | 1.24               | 9.30 10 <sup>-3</sup> | 1.411       | Amino acids-Derivatives             |
| Biotin                                    | 1.099     | 1.49               | 8.85 10 <sup>-4</sup> | 2.284       | Vitamins-Cofactors-Hormones         |

|                                                     |       |       |                      |        |                                     |
|-----------------------------------------------------|-------|-------|----------------------|--------|-------------------------------------|
| Uridine                                             | 1.084 | -1.39 | $1.82 \cdot 10^{-3}$ | 0.671  | Nucleotides-Nucleosides-Derivatives |
| Thiamine monophosphate                              | 1.084 | 1.42  | $2.17 \cdot 10^{-3}$ | 1.809  | Vitamins-Cofactors-Hormones         |
| PC(O-18:2(9Z,12Z)/2:0)                              | 1.081 | -1.45 | $1.16 \cdot 10^{-3}$ | 0.843  | Phospholipids                       |
| Oxoglutaric acid                                    | 1.075 | 1.39  | $1.63 \cdot 10^{-3}$ | 1.702  | Organic acids                       |
| LysoPC(20:2(11Z,14Z))                               | 1.070 | -1.42 | $1.37 \cdot 10^{-3}$ | 0.856  | Phospholipids                       |
| L-Serine                                            | 1.069 | 0.02  | >0.05                | 1.003  | Amino acids-Derivatives             |
| D-Glyceraldehyde-3-phosphate                        | 1.066 | -0.14 | >0.05                |        | Others                              |
| 3-(2-Hydroxyphenyl)propanoic acid                   | 1.059 | 1.39  | $1.84 \cdot 10^{-3}$ | 1.821  | Aromatic compounds-Amines           |
| Indole-3-methyl acetate                             | 1.057 | -1.39 | $1.72 \cdot 10^{-3}$ | 0.421  | Aromatic compounds-Amines           |
| L-Pipecolic acid                                    | 1.056 | -1.38 | $1.86 \cdot 10^{-3}$ | 0.748  | Amino acids-Derivatives             |
| Deoxycytidine                                       | 1.052 | -1.37 | $1.96 \cdot 10^{-3}$ | 0.671  | Nucleotides-Nucleosides-Derivatives |
| 3-Methylhistidine                                   | 1.045 | -1.35 | $2.19 \cdot 10^{-3}$ | 0.768  | Amino acids-Derivatives             |
| N-Alpha-acetyllysine                                | 1.038 | -1.34 | $2.13 \cdot 10^{-3}$ | 0.794  | Amino acids-Derivatives             |
| Glycocholic acid                                    | 1.034 | 1.22  | $4.92 \cdot 10^{-3}$ | 21.090 | Lipids: Fatty acids-Steroids        |
| LysoPC(18:0)                                        | 1.016 | -1.22 | $4.35 \cdot 10^{-3}$ | 0.857  | Phospholipids                       |
| Platelet activating factor                          | 1.016 | -1.22 | $4.50 \cdot 10^{-3}$ | 0.857  | Phospholipids                       |
| L-Arginine                                          | 1.015 | -1.14 | $7.97 \cdot 10^{-3}$ | 0.729  | Amino acids-Derivatives             |
| Indoxyl sulfate                                     | 1.011 | -1.24 | $3.61 \cdot 10^{-3}$ | 0.539  | Aromatic compounds-Amines           |
| L-Malic acid                                        | 1.008 | 1.17  | $5.88 \cdot 10^{-3}$ | 1.634  | Organic acids                       |
| PE(O-16:1(1Z)/22:6(4Z,7Z,10Z,13Z,16Z,19Z))          | 1.006 | 1.10  | $1.57 \cdot 10^{-2}$ | 1.720  | Phospholipids                       |
| Citramalic acid                                     | 0.997 | 1.23  | $3.74 \cdot 10^{-3}$ | 1.355  | Organic acids                       |
| Propionylcarnitine                                  | 0.995 | 1.11  | $8.34 \cdot 10^{-3}$ | 1.520  | Lipids: Fatty acids-Steroids        |
| PC(18:1(9Z)/18:1(9Z))                               | 0.995 | 1.22  | $3.75 \cdot 10^{-3}$ | 1.289  | Phospholipids                       |
| LysoPC(16:0)                                        | 0.979 | -1.17 | $5.30 \cdot 10^{-3}$ | 0.910  | Phospholipids                       |
| Stearic acid                                        | 0.977 | -1.08 | $9.25 \cdot 10^{-3}$ | 0.707  | Lipids: Fatty acids-Steroids        |
| Ornithine                                           | 0.964 | 1.03  | $1.25 \cdot 10^{-2}$ | 1.479  | Amino acids-Derivatives             |
| Corticosterone                                      | 0.960 | 0.72  | >0.05                | 1.488  | Lipids: Fatty acids-Steroids        |
| Uracil                                              | 0.958 | -1.09 | $7.39 \cdot 10^{-3}$ | 0.706  | Nucleotides-Nucleosides-Derivatives |
| LysoPE(0:0/18:1(11Z))                               | 0.929 | 0.86  | $3.41 \cdot 10^{-2}$ | 1.434  | Phospholipids                       |
| PC(16:0/16:0)                                       | 0.905 | 1.00  | $1.05 \cdot 10^{-2}$ | 1.276  | Phospholipids                       |
| D-Glucose                                           | 0.896 | -0.77 | >0.05                | 0.806  | Sugar                               |
| L-Asparagine                                        | 0.888 | 0.96  | $1.26 \cdot 10^{-2}$ | 1.288  | Amino acids-Derivatives             |
| PC(20:4(5Z,8Z,11Z,14Z)/22:6(4Z,7Z,10Z,13Z,16Z,19Z)) | 0.874 | -0.86 | $2.40 \cdot 10^{-2}$ | 0.648  | Phospholipids                       |
| Glucosamine 6-phosphate                             | 0.868 | -0.82 | $3.09 \cdot 10^{-2}$ | 0.738  | Sugar                               |

|                                 |       |       |                      |       |                                     |
|---------------------------------|-------|-------|----------------------|-------|-------------------------------------|
| <b>L-Glutamine</b>              | 0.856 | 0.89  | $1.96 \cdot 10^{-2}$ | 1.186 | Amino acids-Derivatives             |
| <b>L-Histidine</b>              | 0.854 | 0.88  | $1.89 \cdot 10^{-2}$ | 1.164 | Amino acids-Derivatives             |
| <b>Dodecanoylcarnitine</b>      | 0.848 | 0.89  | $1.74 \cdot 10^{-2}$ | 1.969 | Lipids: Fatty acids-Steroids        |
| <b>3-Methylhistamine</b>        | 0.842 | -0.81 | $2.77 \cdot 10^{-2}$ | 0.731 | Amino acids-Derivatives             |
| <b>N-Acetyl-L-phenylalanine</b> | 0.837 | 0.78  | $3.28 \cdot 10^{-2}$ | 1.412 | Amino acids-Derivatives             |
| <b>Gluconic acid</b>            | 0.827 | -0.81 | $3.22 \cdot 10^{-2}$ | 0.575 | Sugar                               |
| <b>Alpha-Tocopherol</b>         | 0.826 | 0.84  | $2.49 \cdot 10^{-2}$ | 1.203 | Lipids: Fatty acids-Steroids        |
| <b>LysoPC(16:1(9Z))</b>         | 0.826 | -0.82 | $2.75 \cdot 10^{-2}$ | 0.839 | Phospholipids                       |
| <b>Fumaric acid</b>             | 0.822 | 0.71  | $4.96 \cdot 10^{-2}$ | 1.424 | Organic acids                       |
| <b>PC(O-14:1/2:0)</b>           | 0.813 | -0.78 | $3.77 \cdot 10^{-2}$ | 0.828 | Phospholipids                       |
| <b>Palmitic acid</b>            | 0.800 | -0.74 | $3.56 \cdot 10^{-2}$ | 0.687 | Lipids: Fatty acids-Steroids        |
| <b>PC(O-14:0/2:0)</b>           | 0.791 | -0.69 | $4.68 \cdot 10^{-2}$ | 0.908 | Phospholipids                       |
| <b>3-Hydroxybutyric acid</b>    | 0.791 | 0.77  | $2.84 \cdot 10^{-2}$ | 1.379 | Organic acids                       |
| <b>PC(O-16:1(11Z)/2:0)</b>      | 0.768 | -0.70 | $3.89 \cdot 10^{-2}$ | 0.874 | Phospholipids                       |
| <b>Azelaic acid</b>             | 0.764 | -0.70 | $4.63 \cdot 10^{-2}$ | 0.756 | Lipids: Fatty acids-Steroids        |
| <b>Uric acid</b>                | 0.761 | -0.72 | $3.60 \cdot 10^{-2}$ | 0.759 | Nucleotides-Nucleosides-Derivatives |
| <b>Isocitric acid</b>           | 0.756 | 0.70  | $4.12 \cdot 10^{-2}$ | 1.196 | Organic acids                       |
| <b>LysoPC(20:0)</b>             | 0.753 | -0.52 | $1.49 \cdot 10^{-1}$ | 0.694 | Phospholipids                       |
| <b>Citric acid</b>              | 0.748 | 0.69  | $4.38 \cdot 10^{-2}$ | 1.187 | Organic acids                       |
| <b>Methylglutaric acid</b>      | 0.742 | -0.66 | $4.79 \cdot 10^{-2}$ | 0.835 | Lipids: Fatty acids-Steroids        |
| <b>Phosphorylcholine</b>        | 0.738 | -0.67 | $4.35 \cdot 10^{-2}$ | 0.679 | Others                              |
| <b>PC(O-18:4/2:0)</b>           | 0.724 | 0.64  | $4.87 \cdot 10^{-2}$ | 1.140 | Phospholipids                       |
| <b>LysoPC(20:3(5Z,8Z,11Z))</b>  | 0.706 | -0.62 | $5.48 \cdot 10^{-2}$ | 0.837 | Phospholipids                       |
| <b>Linoleic acid</b>            | 0.673 | -0.43 | >0.05                | 0.778 | Lipids: Fatty acids-Steroids        |
| <b>Orotic acid</b>              | 0.662 | -0.52 | >0.05                | 0.753 | Nucleotides-Nucleosides-Derivatives |
| <b>PC(15:0/18:2(9Z,12Z))</b>    | 0.654 | 0.50  | $9.01 \cdot 10^{-2}$ | 1.031 | Phospholipids                       |
| <b>trans-Ferulic acid</b>       | 0.644 | -0.39 | >0.05                | 0.504 | Others                              |
| <b>L-Lactic acid</b>            | 0.607 | -0.45 | >0.05                | 0.928 | Organic acids                       |
| <b>PC(15:0/20:1(11Z))</b>       | 0.551 | 0.38  | $1.45 \cdot 10^{-1}$ | 1.140 | Phospholipids                       |
| <b>Allantoin</b>                | 0.532 | -0.30 | >0.05                | 0.885 | Others                              |
| <b>PC(14:0/20:1(11Z))</b>       | 0.531 | 0.22  | $3.86 \cdot 10^{-1}$ | 1.105 | Phospholipids                       |
| <b>Malonate</b>                 | 0.495 | 0.30  | >0.05                | 1.191 | Organic acids                       |
| <b>Urocanic acid</b>            | 0.447 | 0.03  | >0.05                | 1.037 | Amino acids-Derivatives             |
| <b>L-Methionine</b>             | 0.434 | -0.22 | >0.05                | 0.949 | Amino acids-Derivatives             |

Table S2

| Metabolites VIP            | VIP value | Contribution Score | p-value              | Fold Change | Chemical classes                        |
|----------------------------|-----------|--------------------|----------------------|-------------|-----------------------------------------|
| PC(O-14:0/2:0)             | 1.798     | -2.785             | $3.99 \cdot 10^{-4}$ | 0.852       | Phospholipids                           |
| Cytidine                   | 1.596     | -2.154             | $9.09 \cdot 10^{-4}$ | 0.803       | Nucleotides-<br>Nucleosides-Derivatives |
| Cytosine                   | 1.455     | -1.975             | $3.18 \cdot 10^{-3}$ | 0.754       | Nucleotides-<br>Nucleosides-Derivatives |
| Guanosine                  | 1.380     | -1.546             | $2.63 \cdot 10^{-3}$ | 0.602       | Nucleotides-<br>Nucleosides-Derivatives |
| Uric acid                  | 1.377     | -1.509             | $4.43 \cdot 10^{-3}$ | 0.777       | Nucleotides-<br>Nucleosides-Derivatives |
| D-Glucose                  | 1.353     | 1.687              | $4.11 \cdot 10^{-2}$ | 1.329       | Sugar                                   |
| Platelet activating factor | 1.343     | 1.531              | >0.1                 | 1.303       | Lipids: Fatty acids-<br>Steroids        |
| Caprylic acid              | 1.297     | 1.662              | $6.04 \cdot 10^{-3}$ | 2.065       | Lipids: Fatty acids-<br>Steroids        |
| L-Lactic acid              | 1.289     | 1.459              | $1.19 \cdot 10^{-2}$ | 1.158       | Organic acids                           |
| Uracil                     | 1.285     | -1.366             | $6.32 \cdot 10^{-3}$ | 0.659       | Nucleotides-<br>Nucleosides-Derivatives |
| Propionylcarnitine         | 1.273     | 1.373              | $9.18 \cdot 10^{-3}$ | 1.498       | Lipids: Fatty acids-<br>Steroids        |
| PC(16:1(9Z)/22:2(13Z,16Z)) | 1.254     | 1.250              | >0.1                 | 1.095       | Phospholipids                           |
| Biotin                     | 1.243     | -1.488             | $6.45 \cdot 10^{-3}$ | 0.576       | Vitamins-Cofactors-<br>Hormones         |
| Uridine                    | 1.234     | -1.189             | $1.10 \cdot 10^{-2}$ | 0.662       | Nucleotides-<br>Nucleosides-Derivatives |
| Methylguanidine            | 1.221     | 1.193              | $1.57 \cdot 10^{-2}$ | 1.399       | Nucleotides-<br>Nucleosides-Derivatives |
| 3-Hydroxybenzoic acid      | 1.220     | -1.223             | $7.60 \cdot 10^{-3}$ | 0.682       | Aromatic compounds-<br>Amines           |
| Guanine                    | 1.199     | -1.081             | $3.33 \cdot 10^{-2}$ | 0.778       | Nucleotides-<br>Nucleosides-Derivatives |
| LysoPC(18:0)               | 1.183     | 1.130              | >0.1                 | 1.259       | Phospholipids                           |
| Inosine                    | 1.181     | -1.050             | $1.81 \cdot 10^{-2}$ | 0.768       | Nucleotides-<br>Nucleosides-Derivatives |
| L-Homoserine               | 1.164     | 1.352              | >0.1                 | 1.202       | Amino acids-Derivatives                 |
| L-Aspartic acid            | 1.156     | -0.991             | $6.69 \cdot 10^{-2}$ | 0.555       | Amino acids-Derivatives                 |
| PC(21:0)                   | 1.136     | 0.892              | >0.1                 | 0.984       | Phospholipids                           |
| Creatine                   | 1.133     | 1.035              | $1.56 \cdot 10^{-2}$ | 1.195       | Amino acids-Derivatives                 |
| PC(18:1(9Z)/18:1(9Z))      | 1.123     | 1.024              | >0.1                 | 1.339       | Phospholipids                           |
| Cortisol                   | 1.118     | 1.060              | $3.03 \cdot 10^{-2}$ | 1.557       | Lipids: Fatty acids-<br>Steroids        |
| N-Acetylputrescine         | 1.114     | 1.373              | $2.29 \cdot 10^{-2}$ | 1.275       | Organic acids                           |
| Thiamine monophosphate     | 1.104     | -0.904             | $6.06 \cdot 10^{-2}$ | 0.747       | Vitamins-Cofactors-<br>Hormones         |

|                                                  |       |        |                      |       |                                     |
|--------------------------------------------------|-------|--------|----------------------|-------|-------------------------------------|
| <b>PC(O-18:2(9Z,12Z)/2:0)</b>                    | 1.095 | -0.842 | $7.36 \cdot 10^{-2}$ | 0.759 | Phospholipids                       |
| <b>L-Arginine</b>                                | 1.087 | 1.338  | >0.1                 | 1.163 | Amino acids-Derivatives             |
| <b>4-Trimethylammoniobutanoic acid</b>           | 1.067 | -0.927 | $4.71 \cdot 10^{-2}$ | 0.825 | Lipids: Fatty acids-Steroids        |
| <b>L-Threonine</b>                               | 1.064 | 1.579  | >0.1                 | 1.190 | Amino acids-Derivatives             |
| <b>Palmitic acid</b>                             | 1.042 | -0.829 | $1.91 \cdot 10^{-2}$ | 0.677 | Lipids: Fatty acids-Steroids        |
| <b>Hippuric acid</b>                             | 1.035 | -0.747 | $3.29 \cdot 10^{-2}$ | 0.494 | Amino acids-Derivatives             |
| <b>Ketoleucine</b>                               | 1.029 | 0.799  | $7.47 \cdot 10^{-2}$ | 0.883 | Amino acids-Derivatives             |
| <b>L-Dopa</b>                                    | 1.011 | 1.360  | $4.54 \cdot 10^{-2}$ | 1.273 | Vitamins-Cofactors-Hormones         |
| <b>Valerolactone</b>                             | 1.007 | -0.823 | $3.27 \cdot 10^{-2}$ | 0.859 | Others                              |
| <b>PC(14:0/20:1(11Z))</b>                        | 1.005 | 0.682  | >0.1                 | 1.061 | Phospholipids                       |
| <b>PC(14:0/22:1(13Z))</b>                        | 1.000 | 0.760  | >0.1                 | 1.088 | Phospholipids                       |
| <b>Adenosine monophosphate</b>                   | 0.998 | 0.823  | >0.1                 | 2.181 | Nucleotides-Nucleosides-Derivatives |
| <b>Urocanic acid</b>                             | 0.991 | -0.847 | $4.35 \cdot 10^{-2}$ | 0.448 | Amino acids-Derivatives             |
| <b>PC(18:1(11Z)/22:6(4Z,7Z,10Z,13Z,16Z,19Z))</b> | 0.985 | -0.876 | >0.1                 | 0.443 | Phospholipids                       |
| <b>Succinic acid</b>                             | 0.967 | -0.785 | $7.45 \cdot 10^{-2}$ | 0.499 | Organic acids                       |
| <b>NEPSILON,NEPSILON,NEPSILON-TRIMET</b>         | 0.956 | 0.574  | >0.1                 | 1.139 | Others                              |
| <b>LysoPC(18:2(9Z,12Z))</b>                      | 0.953 | -0.628 | >0.1                 | 0.895 | Phospholipids                       |
| <b>N-Methyltryptamine</b>                        | 0.945 | 0.730  | >0.1                 | 1.270 | Aromatic compounds-Amines           |
| <b>Vanillylmandelic acid</b>                     | 0.941 | -0.721 | $8.78 \cdot 10^{-2}$ | 0.376 | Aromatic compounds-Amines           |
| <b>Pantothenic acid</b>                          | 0.927 | -0.614 | $5.47 \cdot 10^{-2}$ | 0.852 | Vitamins-Cofactors-Hormones         |
| <b>Serotonin</b>                                 | 0.913 | 0.475  | >0.1                 | 1.356 | Amino acids-Derivatives             |
| <b>N-Acetylmethionine</b>                        | 0.911 | -1.832 | $3.96 \cdot 10^{-2}$ | 0.617 | Amino acids-Derivatives             |
| <b>Picolinic acid</b>                            | 0.908 | 0.685  | >0.1                 | 0.818 | Amino acids-Derivatives             |
| <b>SM(d18:1/18:0)</b>                            | 0.908 | 0.418  | >0.1                 | 1.204 | Lipids: Fatty acids-Steroids        |
| <b>PC(O-16:1(11Z)/2:0)</b>                       | 0.894 | 0.671  | $9.09 \cdot 10^{-2}$ | 1.193 | Phospholipids                       |
| <b>PC(16:0/22:5(4Z,7Z,10Z,13Z,16Z))</b>          | 0.882 | 0.371  | >0.1                 | 0.989 | Phospholipids                       |
| <b>L-Serine</b>                                  | 0.874 | 0.978  | >0.1                 | 1.190 | Amino acids-Derivatives             |
| <b>Pyroglutamic acid</b>                         | 0.873 | -0.552 | $4.63 \cdot 10^{-2}$ | 0.845 | Amino acids-Derivatives             |
| <b>LysoPC(16:0)</b>                              | 0.867 | 0.491  | >0.1                 | 1.112 | Phospholipids                       |
| <b>Glyceric acid</b>                             | 0.861 | 0.784  | >0.1                 | 1.043 | Sugar                               |
| <b>L-Methionine</b>                              | 0.855 | 0.726  | >0.1                 | 1.153 | Amino acids-Derivatives             |
| <b>Gluconic acid</b>                             | 0.848 | -0.663 | $5.10 \cdot 10^{-2}$ | 0.743 | Sugar                               |
| <b>Tetradecanoylcarnitine</b>                    | 0.841 | -0.581 | >0.1                 | 0.755 | Lipids: Fatty acids-Steroids        |
| <b>PC(14:1(9Z)/22:2(13Z,16Z))</b>                | 0.835 | 0.455  | >0.1                 | 0.907 | Phospholipids                       |

|                                           |       |        |                      |       |                                     |
|-------------------------------------------|-------|--------|----------------------|-------|-------------------------------------|
| <b>Caproic acid</b>                       | 0.832 | -0.459 | >0.1                 | 0.887 | Lipids: Fatty acids-Steroids        |
| <b>Diethanolamine</b>                     | 0.831 | 0.794  | >0.1                 | 1.266 | Aromatic compounds-Amines           |
| <b>Citric acid</b>                        | 0.818 | 0.706  | >0.1                 | 1.928 | Organic acids                       |
| <b>Spermidine</b>                         | 0.801 | 0.648  | >0.1                 | 1.012 | Aromatic compounds-Amines           |
| <b>Diaminopimelic acid</b>                | 0.782 | 0.591  | $8.81 \cdot 10^{-2}$ | 1.339 | Amino acids-Derivatives             |
| <b>Menadione</b>                          | 0.773 | 0.516  | >0.1                 | 1.769 | Vitamins-Cofactors-Hormones         |
| <b>Isocitric acid</b>                     | 0.748 | 0.607  | >0.1                 | 1.677 | Organic acids                       |
| <b>Indoleacetic acid</b>                  | 0.739 | 0.397  | >0.1                 | 1.049 | Aromatic compounds-Amines           |
| <b>Orotic acid</b>                        | 0.736 | -0.332 | >0.1                 | 0.739 | Nucleotides-Nucleosides-Derivatives |
| <b>Glucose 1-phosphate</b>                | 0.733 | 0.683  | >0.1                 | 1.525 | Sugar                               |
| <b>1-Aminocyclopropanecarboxylic acid</b> | 0.722 | 1.183  | >0.1                 | 1.090 | Amino acids-Derivatives             |
| <b>5-Hydroxylysine</b>                    | 0.721 | 2.195  | >0.1                 | 1.119 | Amino acids-Derivatives             |
| <b>(2E,4E)-2,4-Hexadienoic acid</b>       | 0.715 | 0.230  | >0.1                 | 1.053 | Lipids: Fatty acids-Steroids        |
| <b>3-Aminoisobutanoic acid</b>            | 0.701 | 0.527  | >0.1                 | 1.023 | Amino acids-Derivatives             |
| <b>Glucose 6-phosphate</b>                | 0.699 | 0.552  | >0.1                 | 2.734 | Sugar                               |
| <b>Malic acid</b>                         | 0.695 | -0.229 | >0.1                 | 0.913 | Organic acids                       |
| <b>Galactitol</b>                         | 0.679 | -0.257 | >0.1                 | 0.844 | Sugar                               |
| <b>trans-Cinnamate</b>                    | 0.673 | 0.743  | >0.1                 | 1.090 | Aromatic compounds-Amines           |
| <b>Dethiobiotin</b>                       | 0.665 | 0.280  | >0.1                 | 1.175 | Lipids: Fatty acids-Steroids        |
| <b>4-Acetamidobutanoic acid</b>           | 0.652 | -0.365 | >0.1                 | 0.694 | Organic acids                       |
| <b>Fumaric acid</b>                       | 0.646 | -0.172 | >0.1                 | 0.914 | Organic acids                       |
| <b>Phosphocreatine</b>                    | 0.621 | 0.454  | >0.1                 | 2.010 | Amino acids-Derivatives             |
| <b>Decanoylcarnitine</b>                  | 0.617 | 0.496  | >0.1                 | 1.151 | Lipids: Fatty acids-Steroids        |
| <b>Riboflavin</b>                         | 0.556 | -0.156 | >0.1                 | 0.787 | Vitamins-Cofactors-Hormones         |
| <b>Deoxycholic acid</b>                   | 0.466 | 0.357  | >0.1                 | 1.076 | Lipids: Fatty acids-Steroids        |
| <b>2-Hydroxypyridine</b>                  | 0.440 | -0.646 | >0.1                 | 0.977 | Nucleotides-Nucleosides-Derivatives |
| <b>Taurine</b>                            | 0.392 | 0.313  | >0.1                 | 1.028 | Organic acids                       |

Table S3

| Elements only in serum :          |                      |             |
|-----------------------------------|----------------------|-------------|
|                                   | p-value              | Fold Change |
| 3-(2-Hydroxyphenyl)propanoic acid | $1.84 \cdot 10^{-3}$ | 1.821       |
| 3-Hydroxybutyric acid             | $2.84 \cdot 10^{-2}$ | 1.379       |
| 3-Methylhistamine                 | $2.77 \cdot 10^{-2}$ | 0.731       |
| 3-Methylhistidine                 | $2.19 \cdot 10^{-3}$ | 0.768       |
| Allantoin                         | >0.05                | 0.885       |
| Alpha-Tocopherol                  | $2.49 \cdot 10^{-2}$ | 1.203       |
| Azelaic acid                      | $4.63 \cdot 10^{-2}$ | 0.756       |
| Cholesteryl acetate               | $1.10 \cdot 10^{-3}$ | 1.929       |
| Cholic acid                       | $3.19 \cdot 10^{-5}$ | 20.144      |
| Citramalic acid                   | $3.74 \cdot 10^{-3}$ | 1.355       |
| Corticosterone                    | >0.05                | 1.488       |
| Deoxycytidine                     | $1.96 \cdot 10^{-3}$ | 0.671       |
| D-Glyceraldehyde-3-phosphate      | >0.05                |             |
| Dodecanoylcarnitine               | $1.74 \cdot 10^{-2}$ | 1.969       |
| Glucosamine 6-phosphate           | $3.09 \cdot 10^{-2}$ | 0.738       |
| Glycerophosphocholine             | $2.54 \cdot 10^{-4}$ | 0.425       |
| Glycocholic acid                  | $4.92 \cdot 10^{-3}$ | 21.090      |
| Guanidoacetic acid                | $9.68 \cdot 10^{-5}$ | 2.290       |
| Indole-3-methyl acetate           | $1.72 \cdot 10^{-3}$ | 0.421       |
| Indoxyl sulfate                   | $3.61 \cdot 10^{-3}$ | 0.539       |
| L-Acetylcarnitine                 | $6.81 \cdot 10^{-5}$ | 1.531       |
| L-Asparagine                      | $1.26 \cdot 10^{-2}$ | 1.288       |
| L-Glutamine                       | $1.96 \cdot 10^{-2}$ | 1.186       |
| L-Histidine                       | $1.89 \cdot 10^{-2}$ | 1.164       |
| Linoleic acid                     | >0.05                | 0.778       |
| L-Lysine                          | $6.95 \cdot 10^{-4}$ | 0.780       |
| L-Pipecolic acid                  | $1.86 \cdot 10^{-3}$ | 0.748       |
| L-Valine                          | $9.30 \cdot 10^{-3}$ | 1.411       |
| LysoPC(16:1(9Z))                  | $2.75 \cdot 10^{-2}$ | 0.839       |
| LysoPC(20:0)                      | $1.49 \cdot 10^{-1}$ | 0.694       |
| LysoPC(20:2(11Z,14Z))             | $1.37 \cdot 10^{-3}$ | 0.856       |
| LysoPC(20:3(5Z,8Z,11Z))           | $5.48 \cdot 10^{-2}$ | 0.837       |
| LysoPE(0:0/18:1(11Z))             | $3.41 \cdot 10^{-2}$ | 1.434       |
| Malonate                          | >0.05                | 1.191       |
| Methylglutaric acid               | $4.79 \cdot 10^{-2}$ | 0.835       |

|                                                     |                       |       |
|-----------------------------------------------------|-----------------------|-------|
| N-Acetyl-L-phenylalanine                            | 3.28 10 <sup>-2</sup> | 1.412 |
| N-Acetylserotonin                                   | 4.57 10 <sup>-5</sup> | 0.377 |
| N-acetyltryptophan                                  | 1.52 10 <sup>-4</sup> | 2.990 |
| N-Alpha-acetyllysine                                | 2.13 10 <sup>-3</sup> | 0.794 |
| Nicotinic acid                                      | 6.80 10 <sup>-4</sup> | 1.659 |
| O-Acetyl-L-carnitine                                | 7.14 10 <sup>-5</sup> |       |
| Ornithine                                           | 1.25 10 <sup>-2</sup> | 1.479 |
| Oxoglutaric acid                                    | 1.63 10 <sup>-3</sup> | 1.702 |
| PC(14:0/16:0)                                       | 3.45 10 <sup>-5</sup> | 1.566 |
| PC(15:0/16:0)                                       | 5.84 10 <sup>-4</sup> | 1.441 |
| PC(15:0/18:2(9Z,12Z))                               | 9.01 10 <sup>-2</sup> | 1.031 |
| PC(15:0/20:1(11Z))                                  | 1.45 10 <sup>-1</sup> | 1.140 |
| PC(15:0/20:2(11Z,14Z))                              | 1.18 10 <sup>-4</sup> | 1.521 |
| PC(16:0/16:0)                                       | 1.05 10 <sup>-2</sup> | 1.276 |
| PC(20:4(5Z,8Z,11Z,14Z)/22:6(4Z,7Z,10Z,13Z,16Z,19Z)) | 2.40 10 <sup>-2</sup> | 0.648 |
| PC(O-14:1/2:0)                                      | 4.68 10 <sup>-2</sup> | 0.908 |
| PC(O-18:4/2:0)                                      | 4.87 10 <sup>-2</sup> | 1.140 |
| PE(16:0/20:4(5Z,8Z,11Z,14Z))                        | 3.91 10 <sup>-4</sup> | 2.151 |
| PE(20:4(5Z,8Z,11Z,14Z)/18:1(11Z))                   | 1.42 10 <sup>-3</sup> | 3.428 |
| PE(22:6(4Z,7Z,10Z,13Z,16Z,19Z)/18:1(11Z))           | 3.24 10 <sup>-3</sup> | 3.738 |
| PE(O-16:1(1Z)/22:6(4Z,7Z,10Z,13Z,16Z,19Z))          | 1.57 10 <sup>-2</sup> | 1.720 |
| Phosphorylcholine                                   | 4.35 10 <sup>-2</sup> | 0.679 |
| Stearic acid                                        | 9.25 10 <sup>-3</sup> | 0.707 |
| trans-Ferulic acid                                  | >0.05                 | 0.504 |
| Trigonelline                                        | 1.39 10 <sup>-4</sup> | 0.425 |

| Elements only in soleus :          |                       |             |
|------------------------------------|-----------------------|-------------|
|                                    | p-value               | Fold change |
| (2E,4E)-2,4-Hexadienoic acid       | >0.1                  | 1.053       |
| 1-Aminocyclopropanecarboxylic acid | >0.1                  | 1.090       |
| 2-Hydroxypyridine                  | >0.1                  | 0.977       |
| 3-Aminoisobutanoic acid            | >0.1                  | 1.023       |
| 3-Hydroxybenzoic acid              | 7.60 10 <sup>-3</sup> | 0.682       |
| 4-Acetamidobutanoic acid           | >0.1                  | 0.694       |
| 5-Hydroxylysine                    | >0.1                  | 1.119       |
| Adenosine monophosphate            | >0.1                  | 2.181       |
| Caproic acid                       | >0.1                  | 0.887       |
| Caprylic acid                      | 6.04 10 <sup>-3</sup> | 2.065       |



|                                                  |                       |       |
|--------------------------------------------------|-----------------------|-------|
| <b>Cortisol</b>                                  | 3.03 10 <sup>-2</sup> | 1.557 |
| <b>Creatine</b>                                  | 1.56 10 <sup>-2</sup> | 1.195 |
| <b>Cytidine</b>                                  | 9.09 10 <sup>-4</sup> | 0.803 |
| <b>Decanoylcarnitine</b>                         | >0.1                  | 1.151 |
| <b>Deoxycholic acid</b>                          | >0.1                  | 1.076 |
| <b>Dethiobiotin</b>                              | >0.1                  | 1.175 |
| <b>Diaminopimelic acid</b>                       | 8.81 10 <sup>-2</sup> | 1.339 |
| <b>Diethanolamine</b>                            | >0.1                  | 1.266 |
| <b>Galactitol</b>                                | >0.1                  | 0.844 |
| <b>Glucose 1-phosphate</b>                       | >0.1                  | 1.525 |
| <b>Glucose 6-phosphate</b>                       | >0.1                  | 2.734 |
| <b>Glyceric acid</b>                             | >0.1                  | 1.043 |
| <b>Guanine</b>                                   | 3.33 10 <sup>-2</sup> | 0.778 |
| <b>Guanosine</b>                                 | 2.63 10 <sup>-3</sup> | 0.602 |
| <b>Inosine</b>                                   | 1.81 10 <sup>-2</sup> | 0.768 |
| <b>L-Aspartic acid</b>                           | 6.69 10 <sup>-2</sup> | 0.555 |
| <b>L-Dopa</b>                                    | 4.54 10 <sup>-2</sup> | 1.273 |
| <b>L-Homoserine</b>                              | >0.1                  | 1.202 |
| <b>LysoPC(18:2(9Z,12Z))</b>                      | >0.1                  | 0.895 |
| <b>Menadione</b>                                 | >0.1                  | 1.769 |
| <b>Methylguanidine</b>                           | 1.57 10 <sup>-2</sup> | 1.399 |
| <b>N-Acetylmethionine</b>                        | 3.96 10 <sup>-2</sup> | 0.617 |
| <b>N-Acetylputrescine</b>                        | 2.29 10 <sup>-2</sup> | 1.275 |
| <b>NEPSILON,NEPSILON,NEPSILON-TRIMET</b>         | >0.1                  | 1.139 |
| <b>Pantothenic acid</b>                          | 5.47 10 <sup>-2</sup> | 0.852 |
| <b>PC(14:0/22:1(13Z))</b>                        | >0.1                  | 1.088 |
| <b>PC(14:1(9Z)/22:2(13Z,16Z))</b>                | >0.1                  | 0.907 |
| <b>PC(16:0/22:5(4Z,7Z,10Z,13Z,16Z))</b>          | >0.1                  | 0.989 |
| <b>PC(16:1(9Z)/22:2(13Z,16Z))</b>                | >0.1                  | 1.095 |
| <b>PC(18:1(11Z)/22:6(4Z,7Z,10Z,13Z,16Z,19Z))</b> | >0.1                  | 0.443 |
| <b>PC(21:0)</b>                                  | >0.1                  | 0.984 |
| <b>Phosphocreatine</b>                           | >0.1                  | 2.010 |
| <b>Picolinic acid</b>                            | >0.1                  | 0.818 |
| <b>Pyroglutamic acid</b>                         | 4.63 10 <sup>-2</sup> | 0.845 |
| <b>Riboflavin</b>                                | >0.1                  | 0.787 |
| <b>SM(d18:1/18:0)</b>                            | >0.1                  | 1.204 |
| <b>Spermidine</b>                                | >0.1                  | 1.012 |
| <b>Succinic acid</b>                             | 7.45 10 <sup>-2</sup> | 0.499 |
| <b>Taurine</b>                                   | >0.1                  | 1.028 |

|                       |                      |       |
|-----------------------|----------------------|-------|
| trans-Cinnamate       | >0.1                 | 1.090 |
| Valerolactone         | $3.27 \cdot 10^{-2}$ | 0.859 |
| Vanillylmandelic acid | $8.78 \cdot 10^{-2}$ | 0.376 |

| Common elements in serum soleus : | Serum                |             | Soleus               |             |
|-----------------------------------|----------------------|-------------|----------------------|-------------|
|                                   | p-value              | Fold Change | p-value              | Fold Change |
| Biotin                            | $8.85 \cdot 10^{-4}$ | 2.284       | $6.45 \cdot 10^{-3}$ | 0.576       |
| 4-Trimethylammoniobutanoic acid   | $1.15 \cdot 10^{-4}$ | 1.553       | $4.71 \cdot 10^{-2}$ | 0.825       |
| Citric acid                       | $4.38 \cdot 10^{-2}$ | 1.187       | >0.1                 | 1.928       |
| Cytosine                          | $3.10 \cdot 10^{-4}$ | 0.601       | $3.18 \cdot 10^{-3}$ | 0.754       |
| D-Glucose                         | >0.05                | 0.806       | $4.11 \cdot 10^{-2}$ | 1.329       |
| Fumaric acid                      | $4.96 \cdot 10^{-2}$ | 1.424       | >0.1                 | 0.914       |
| Gluconic acid                     | $3.22 \cdot 10^{-2}$ | 0.575       | $5.10 \cdot 10^{-2}$ | 0.743       |
| Hippuric acid                     | $3.50 \cdot 10^{-6}$ | 0.056       | $3.29 \cdot 10^{-2}$ | 0.494       |
| Indoleacetic acid                 | $1.77 \cdot 10^{-4}$ | 2.569       | >0.1                 | 1.049       |
| Isocitric acid                    | $4.12 \cdot 10^{-2}$ | 1.196       | >0.1                 | 1.677       |
| Ketoleucine                       | $7.24 \cdot 10^{-4}$ | 0.474       | $7.47 \cdot 10^{-2}$ | 0.883       |
| L-Arginine                        | $7.97 \cdot 10^{-3}$ | 0.729       | >0.1                 | 1.163       |
| L-Lactic acid                     | >0.05                | 0.928       | $1.19 \cdot 10^{-2}$ | 1.158       |
| L-Malic acid                      | $5.88 \cdot 10^{-3}$ | 1.634       | >0.1                 | 0.913       |
| L-Methionine                      | >0.05                | 0.949       | >0.1                 | 1.153       |
| L-Serine                          | >0.05                | 1.003       | >0.1                 | 1.190       |
| L-Threonine                       | >0.05                | 0.964       | >0.1                 | 1.190       |
| LysoPC(16:0)                      | $5.30 \cdot 10^{-3}$ | 0.910       | >0.1                 | 1.112       |
| LysoPC(18:0)                      | $4.35 \cdot 10^{-3}$ | 0.857       | >0.1                 | 1.259       |
| N-Methyltryptamine                | $1.45 \cdot 10^{-3}$ | 0.323       | >0.1                 | 1.270       |
| Orotic acid                       | >0.05                | 0.753       | >0.1                 | 0.739       |
| Palmitic acid                     | $3.56 \cdot 10^{-2}$ | 0.687       | $1.91 \cdot 10^{-2}$ | 0.677       |
| PC(14:0/20:1(11Z))                | $3.86 \cdot 10^{-1}$ | 1.105       | >0.1                 | 1.061       |
| PC(18:1(9Z)/18:1(9Z))             | $3.75 \cdot 10^{-3}$ | 1.289       | >0.1                 | 1.339       |
| PC(O-14:1/2:0)                    | $3.77 \cdot 10^{-2}$ | 0.828       | $3.99 \cdot 10^{-4}$ | 0.852       |
| PC(O-16:1(11Z)/2:0)               | $3.89 \cdot 10^{-2}$ | 0.874       | $9.09 \cdot 10^{-2}$ | 1.193       |
| PC(O-18:2(9Z,12Z)/2:0)            | $1.16 \cdot 10^{-3}$ | 0.843       | $7.36 \cdot 10^{-2}$ | 0.759       |
| Platelet activating factor        | $4.50 \cdot 10^{-3}$ | 0.857       | >0.1                 | 1.303       |
| Propionylcarnitine                | $8.34 \cdot 10^{-3}$ | 1.520       | $9.18 \cdot 10^{-3}$ | 1.498       |
| Serotonin                         | $8.87 \cdot 10^{-6}$ | 0.476       | >0.1                 | 1.356       |
| Tetradecanoylcarnitine            | $2.89 \cdot 10^{-4}$ | 2.052       | >0.1                 | 0.755       |
| Thiamine monophosphate            | $2.17 \cdot 10^{-3}$ | 1.809       | $6.06 \cdot 10^{-2}$ | 0.747       |
| Uracil                            | $7.39 \cdot 10^{-3}$ | 0.706       | $6.32 \cdot 10^{-3}$ | 0.659       |

|                      |                       |       |                       |       |
|----------------------|-----------------------|-------|-----------------------|-------|
| <b>Uric acid</b>     | 3.60 10 <sup>-2</sup> | 0.759 | 4.43 10 <sup>-3</sup> | 0.777 |
| <b>Uridine</b>       | 1.82 10 <sup>-3</sup> | 0.671 | 1.10 10 <sup>-2</sup> | 0.662 |
| <b>Urocanic acid</b> | >0.05                 | 1.037 | 4.35 10 <sup>-2</sup> | 0.448 |
